# **Aging and neurodegeneration are associated with increased mutations in single human neurons**

**Authors:** Michael A. Lodato<sup>1†</sup>, Rachel E. Rodin<sup>1,2†</sup>, Craig L. Bohrsen<sup>3†</sup>, Michael E. Coulter<sup>1,2†</sup>, Alison R. Barton<sup>3†</sup>, Minseok Kwon<sup>3†</sup>, Maxwell A. Sherman<sup>3</sup>, Carl M. Vitzthum<sup>3</sup>, Lovelace J. Luquette<sup>3</sup>, Chandri Yandava<sup>4</sup>, Pengwei Yang<sup>4</sup>, Thomas W. Chittenden<sup>4,5,6</sup>, Nicole E. Hatem<sup>1</sup>, Steven C. Ryu<sup>1</sup>, Mollie B. Woodworth<sup>1,7</sup>, Peter J. Park<sup>3,8\*</sup>, Christopher A. Walsh<sup>1\*</sup>

## **Affiliations:**

<sup>1</sup> Division of Genetics and Genomics, Manton Center for Orphan Disease, and Howard Hughes Medical Institute, Boston Children's Hospital, Boston, MA, USA; Departments of Neurology and Pediatrics, Harvard Medical School, Boston, MA, USA; Broad Institute of MIT and Harvard, Cambridge, MA, USA.

<sup>2</sup> Program in Neuroscience and Harvard/MIT MD-PHD Program, Harvard Medical School, Boston, MA, USA

<sup>3</sup> Department of Biomedical Informatics, Harvard Medical School, Boston, MA, USA

<sup>4</sup> Computational Statistics and Bioinformatics Group, Advanced Artificial Intelligence Research Laboratory, WuXi NextCODE, Cambridge, MA, USA

<sup>5</sup> Department of Biological Engineering, Massachusetts Institute of Technology, Cambridge MA, USA

<sup>6</sup> Division of Genetics and Genomics, Boston Children's Hospital, Harvard Medical School, Boston, MA, USA

<sup>7</sup> Present Address: Cañada College, Redwood City, CA

<sup>8</sup> Division of Genetics, Brigham and Women's Hospital, Boston, MA, USA

† These authors contributed equally to this work.

\* Correspondence to: [peter\\_park@hms.harvard.edu](mailto:peter_park@hms.harvard.edu); [christopher.walsh@childrens.harvard.edu](mailto:christopher.walsh@childrens.harvard.edu)

## **One-Sentence Summary:**

Somatic single-nucleotide variants accumulate in human neurons in aging with regional specificity and in progeroid diseases.

## **Summary: (125 words max)**

It has long been hypothesized that aging and neurodegeneration are associated with somatic mutation in neurons; however, methodological hurdles have prevented testing this hypothesis directly. We used single-cell whole-genome sequencing to perform genome-wide somatic single-nucleotide variant (sSNV) identification on DNA from 161 single neurons from the prefrontal cortex and hippocampus of fifteen normal individuals (aged 4 months to 82 years) as well as nine individuals affected by early-onset neurodegeneration due to genetic disorders of DNA repair (Cockayne syndrome and Xeroderma pigmentosum). sSNVs increased approximately linearly with age in both areas (with a higher rate in hippocampus) and were more abundant in neurodegenerative disease. The accumulation of somatic mutations with age—which we term *genosenium*—shows age-related, region-related, and disease-related molecular signatures, and may be important in other human age-associated conditions.

# **Main Text:**

Aging in humans brings increased incidence of nearly all diseases, including neurodegenerative diseases (1). Markers of DNA damage increase in the brain with age (2), and genetic progeroid diseases such as Cockayne syndrome (CS) and Xeroderma pigmentosum (XP), both caused by defects in DNA damage repair (DDR), are associated with neurodegeneration and premature aging (3). Mouse models of aging, CS, and XP have shown inconsistent relationships between these conditions and the accumulation of permanent somatic mutations in brain and non-brain tissue (4-7). While analysis of human bulk brain DNA, comprised of multiple proliferative and non-proliferative cell types, revealed an accumulation of mutations during aging in the human brain (8), it is not known whether permanent somatic mutations accumulate with age in mature neurons of the human brain. Here, we quantitatively examined whether aging or disorders of defective DDR results in more somatic mutations in single postmitotic human neurons.

Somatic mutations that occur in postmitotic neurons are unique to each cell, and thus can only be comprehensively assayed by comparing the genomes of single cells (9). Therefore, we analyzed human neurons by single-cell whole-genome sequencing (WGS). Since alterations of the prefrontal cortex (PFC) have been linked to age-related cognitive decline and neurodegenerative disease (10), we analyzed 93 neurons from PFC of 15 neurologically normal individuals (Tables 1, S1, S2) from ages 4 months to 82 years. We further examined 26 neurons from the hippocampal dentate gyrus (DG) of 6 of these individuals because the DG is a focal point for other age-related degenerative conditions such as Alzheimer's disease. Moreover, the DG is one of the few parts of the brain that appears to undergo neurogenesis after birth (11), which might create regional differences in number and type of somatic mutations. Finally, to test whether defective DDR in early-onset neurodegenerative diseases is associated with increased somatic mutations, we analyzed 42 PFC neurons from 9 individuals diagnosed with CS or XP (Tables 1, S3).

We isolated single neuronal nuclei using flow cytometry, lysed the nuclei on ice in alkaline conditions as we previously performed (12, 13) (Methods) to minimize lysis-induced artifacts, amplified their genomes using multiple displacement amplification (MDA), and subjected the amplified DNA to 45X WGS (Figure 1A). To identify somatic single nucleotide variants (sSNVs) with high confidence, we developed a bioinformatic pipeline called Linked-Read Analysis (LiRA) (14) to delineate true double-stranded sSNVs from single-stranded variants and artifacts. This method employs read-based linkage of candidate sSNVs with nearby germline SNPs and performs a model-based extrapolation of the genome-wide mutational frequency based on the ~20% of sSNVs that are sufficiently close to germline SNPs (Figure 1B; Methods). Importantly, sSNVs determined by our algorithm (Tables S4, S5) showed alternate allele frequency distribution strikingly matching that of the germline SNVs (Figure S1). sSNV counts were not systematically influenced by technical metrics, such as post-mortem interval, time in storage, and coverage uniformity (Figure S2).

Across all normal neurons, genome-wide sSNV counts correlated with age (Figures 2A, S3) ( $p = 9 \times 10^{-12}$ , mixed effects model, see Methods), despite some within-individual and within-age group heterogeneity. To explore potential variation in different brain regions, matched DG and PFC neurons were sequenced in six cases (Figures 2A, S3). Our analysis uncovered region-specific sSNV accumulation with age in both PFC ( $p = 4 \times 10^{-5}$ ) and DG single neurons ( $p = 2 \times 10^{-7}$ ), suggesting an almost two-fold increase in the rate of accumulation in DG (~40 sSNVs/year) relative to PFC (~23 sSNVs/year) ( $p = 8 \times 10^{-4}$ ). Among the six cases, two had

significant increases in DG, three had nominally increased counts in DG compared to PFC, and one had a nominally higher count in PFC (Figure 2B).

Neurons from postmortem brains of CS individuals showed a ~2.3-fold excess of sSNVs relative to the expected age-adjusted normal PFC rate, and XP neurons showed a ~2.5-fold increase ( $p = 0.006$  for both) (Figure 2C). Progeroid neurons showed a similar number of sSNVs as neurons from aged normal PFC, suggesting that defective nucleotide excision repair accelerate aging via sSNV accumulation.

Molecular patterns of sSNVs also evolved with age. We previously reported that cytosine deamination influences patterns of human neuron sSNVs, resulting in abundant C>T mutations (13). C>T sSNVs accounted for most variants in the youngest PFC samples, but this fraction decreased with age (Figures 2D, S4, S5). C>T mutations, while common in many biological contexts (15-18), are also a known artifact of MDA (19). Systematic differences in C>T burden during aging suggest C>T variants are largely biological and not technical in nature. T>C variants increased in the PFC with age (Figures 2E, S4, S5), possibly representing DNA damage linked to fatty-acid oxidation (20). As demonstrated previously (13), neuronal sSNVs in normal PFC were enriched in coding exons (Figure S6, Table S6), displayed a transcriptional strand bias (Figure S7), and genes involved in neural function were enriched for neuronal sSNVs (Figure S8, Tables S7). Coincident probability modeling suggested the linear accumulation of sSNVs in our dataset would result in an exponential accumulation of biallelic deleterious coding mutations, in agreement with classical hypotheses regarding the relationship between mutation and aging (Figure S9) (21), exacerbating differences in sSNV load in aging, across brain regions, and in disease.

Mutational signature analysis (22) revealed three signatures driving single neuron mutational spectra (Figures 3A, B, S10, S11). Signature A was comprised mainly of C>T and T>C mutations and was the only signature to increase with age ( $p = 9 \times 10^{-12}$ ) independent of brain region or disease status (Figure 3C-E). Signature A resembled a “clock-like” signature found in nearly all samples in a large-scale cancer genome analysis (‘Signature 5’) (22) (Figure S10). Our data show for the first time that a similar clock-like signature is also active in postmitotic cells and hence independent of DNA replication.

Signature B consisted primarily of C>T mutations and did not correlate with age (Figure 3D), suggesting a mutational mechanism active at very young ages, perhaps prenatally. Signature B may include technical artifacts, which are primarily C>T, but bona fide clonal sSNVs are also predominantly C>T (8, 12). This signature was enriched in DG compared to PFC ( $p = 2 \times 10^{-4}$ ) (Figure 3F), and increased with age in DG, but not in PFC ( $p = 0.04$ , difference in slopes) (Figure 3G). The observable difference in Signature B between these brain regions, and its correlation with age in DG alone, suggest it is dominated by a biological mechanism, and these PFC-DG differences strikingly mirror differences in neurogenesis.

A third signature, Signature C, was distinct from Signatures A and B by the presence of C>A variants, the mutation class most closely associated with oxidative DNA damage (20). Indeed, CS and XP neurons, defective in DDR, were enriched for Signature C ( $p = 0.016$  and  $0.023$ , respectively) (Figure 3H, I), while Signature C also increased modestly with age in normal neurons ( $p = 0.03$ ). An outlier 5087 PFC neuron with the highest sSNV rate in our data set had a high proportion of Signature C mutations relative to other normal neurons, highlighting that even within a normal brain some neurons may be subject to catastrophic oxidative damage.

Our analysis revealed that sSNVs accumulated slowly but inexorably with age in the normal human brain, a phenomenon we term genosenium, and more rapidly still in progeroid neurodegeneration. Within one year of birth, postmitotic neurons already have ~300-900 sSNVs. Three signatures were associated with mutational processes in human neurons: a postmitotic, clock-like signature of aging, a possibly developmental signature that varied across brain regions, and a disease- and age-specific signature of oxidation and defective DNA damage repair. The increase of oxidative mutations in aging and in disease presents a potential target for therapeutic intervention. Further, elucidating the mechanistic basis of the clock-like accumulation of mutations across brain regions and other tissues would increase our knowledge of age-related disease and cognitive decline. CS and XP cause neurodegeneration associated with higher rates of sSNVs, and it will be important to define how other, more common causes of neurodegeneration may influence genosenium as well.

### **Acknowledgements**

We thank R. Sean Hill, Matthew P. Anderson, Jeffery Gulcher, Zehua Chen, Isidro Cortez, the Dana Farber Cancer Institute Flow Cytometry Core, and the Research Computing group at Harvard Medical School for assistance. Human tissue was obtained from the NIH NeuroBioBank at the University of Maryland, and we thank the donors and their families for their invaluable donations for the advancement of science. This work was supported by K99 AG054749 01, F30 MH102909, 1S10RR028832-01, T32HG002295, U01MH106883, P50MH106933, R01 NS032457 U01 MH106883, the Harvard/MIT MD-PHD program, the Stuart H.Q. and Victoria Quan Fellowship in Neurobiology, the Paul G. Allen Family Foundation. CAW is an Investigator of the Howard Hughes Medical Institute. See Supplement for full Acknowledgments.

## Figures and Table

**Table 1**

| Case ID                      | Sex      | Age (yrs) | Diagnosis | PFC Neurons            | DG Neurons           |
|------------------------------|----------|-----------|-----------|------------------------|----------------------|
| <b>Infant</b>                |          |           |           |                        |                      |
| 1278                         | M        | 0.4       | Normal    | 9                      | -                    |
| 5817                         | M        | 0.6       | Normal    | 4                      | -                    |
|                              |          |           |           | <b>13</b>              | <b>-</b>             |
| <b>Adolescent</b>            |          |           |           |                        |                      |
| 4638                         | F        | 15.1      | Normal    | 10                     | -                    |
| 1465                         | M        | 17.5      | Normal    | 22                     | -                    |
| 5532                         | M        | 18.4      | Normal    | 4                      | 5                    |
| 5559                         | F        | 19.8      | Normal    | 5                      | 5                    |
|                              |          |           |           | <b>41</b>              | <b>10</b>            |
| <b>Adult</b>                 |          |           |           |                        |                      |
| 4643                         | F        | 42.2      | Normal    | 10                     | -                    |
| 5087                         | M        | 44.9      | Normal    | 4                      | 5                    |
| 936                          | F        | 49.2      | Normal    | 3                      | -                    |
|                              |          |           |           | <b>17</b>              | <b>5</b>             |
| <b>Aged</b>                  |          |           |           |                        |                      |
| 5840                         | M        | 75.3      | Normal    | 3                      | 3                    |
| 5219                         | F        | 77        | Normal    | 4                      | -                    |
| 5171                         | M        | 79.2      | Normal    | 4                      | -                    |
| 5511                         | F        | 80.2      | Normal    | 3                      | -                    |
| 5657                         | M        | 82.2      | Normal    | 5                      | 5                    |
| 5823                         | F        | 82.7      | Normal    | 3                      | 3                    |
|                              |          |           |           | <b>22</b>              | <b>11</b>            |
| <b>Cockayne syndrome</b>     |          |           |           |                        |                      |
| 1762                         | F        | 4.4       | CS (CSB)  | 6                      | -                    |
| 1124                         | F        | 4.7       | CS (CSB)  | 3                      | -                    |
| 1286                         | M        | 5.8       | CS (CSB)  | 4                      | -                    |
| 580                          | F        | 8.4       | CS (CSB)  | 4                      | -                    |
| 5105                         | M        | 8.7       | CS (CSB)  | 6                      | -                    |
| 682                          | M        | 32.8      | CS (CSB)  | 4                      | -                    |
|                              |          |           |           | <b>27</b>              | <b>-</b>             |
| <b>Xeroderma pigmentosum</b> |          |           |           |                        |                      |
| 5379                         | F        | 24        | XP (XPA)  | 6                      | -                    |
| 5316                         | F        | 44.5      | XP (XPA)  | 3                      | -                    |
| 5416                         | F        | 46        | XP (XPD)  | 6                      | -                    |
|                              |          |           |           | <b>15</b>              | <b>-</b>             |
| <b>Total</b>                 | 24 cases |           |           | <b>135 PFC Neurons</b> | <b>26 DG Neurons</b> |
|                              |          |           |           | <b>161 neurons</b>     |                      |

**Table 1.** Case information and number of neurons analyzed in this study.

**Figure 1**

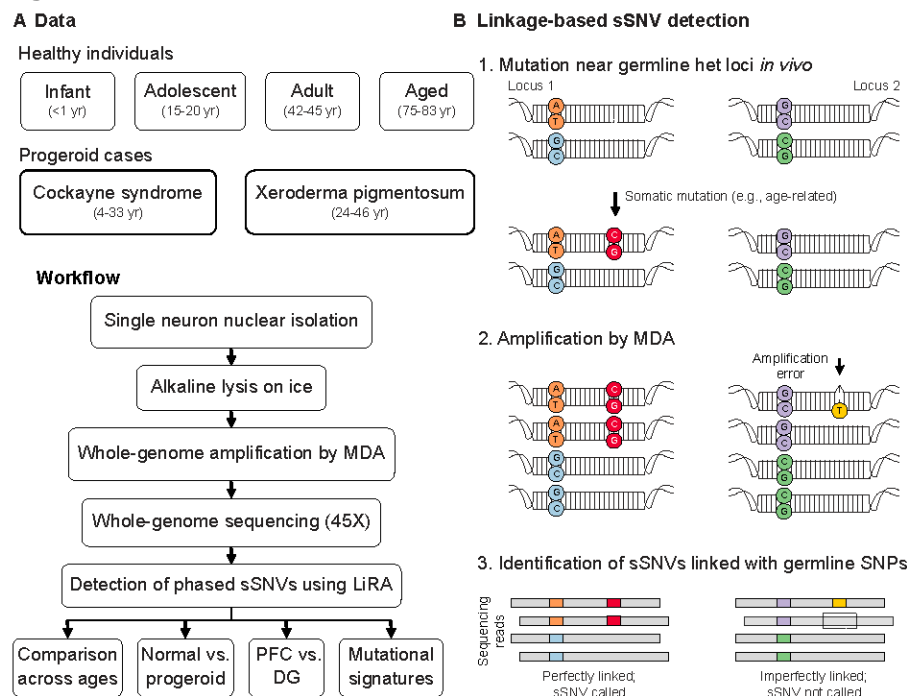

**Figure 1. Detection of sSNVs across individuals and brain regions using single-neuron WGS and linkage-based analysis.** (A) Experimental outline. (B) Schematic of linkage-based mutation calling. A somatic mutation (red) may occur on one allele (Allele 1) of a locus (Locus 1), potentially in close proximity to a germline heterozygous site (blue and light blue), while other loci, such as Locus 2, remain unmutated. Later amplification errors could create a mismatch (purple) on one strand of one allele of Locus 2 near a germline variant (light green). For Locus 1, any WGS read that covers both sites and contains the germline (blue) variant should also contain the somatic (red) variant, thus these variants are perfectly linked. In contrast, at Locus 2 some but not all reads that cover the relevant germline variant (light green) will contain the somatic “variant” candidate (purple), generating two classes of reads, some with the somatic variant on that allele, some without. Only perfectly linked sSNV candidates were considered in this study.

**Figure 2**

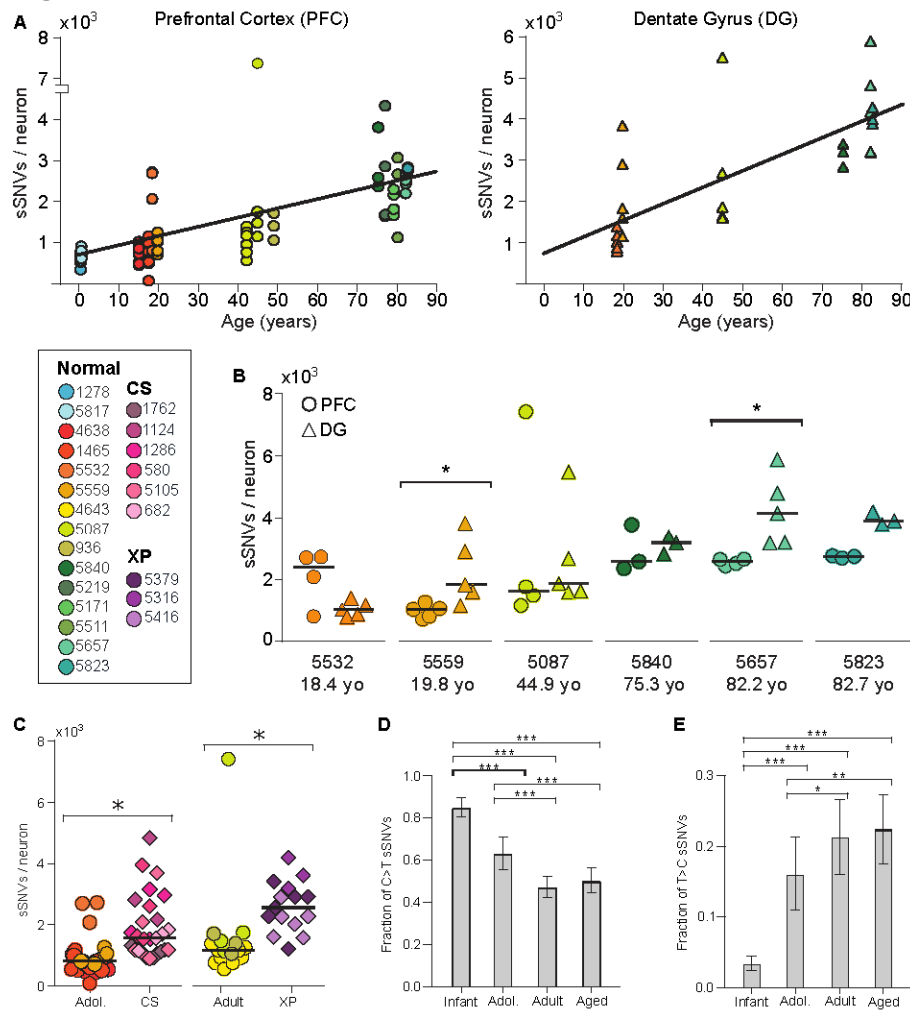

**Figure 2. sSNVs increase with age in the PFC and DG, and are elevated in CS and XP.**

(A) sSNV counts plotted against age for neurons derived from PFC (circles) and DG (triangles), with linear regression lines. There is a strong correlation with age in both cases, with the rate of accumulation being nearly two-fold higher in the DG than in the PFC. (B) Comparison of sSNV counts in matched PFC and DG within brains. (C) CS and XP patient neurons display elevated sSNV counts. (D, E) Fraction of sSNVs comprised of C>T (D) and T>C (E). \*, \*\*, and \*\*\* denote  $p \leq 0.05$ , 0.001, and 0.0001, respectively, using 2-way ANOVA with Sidak's correction.



**Figure 3**

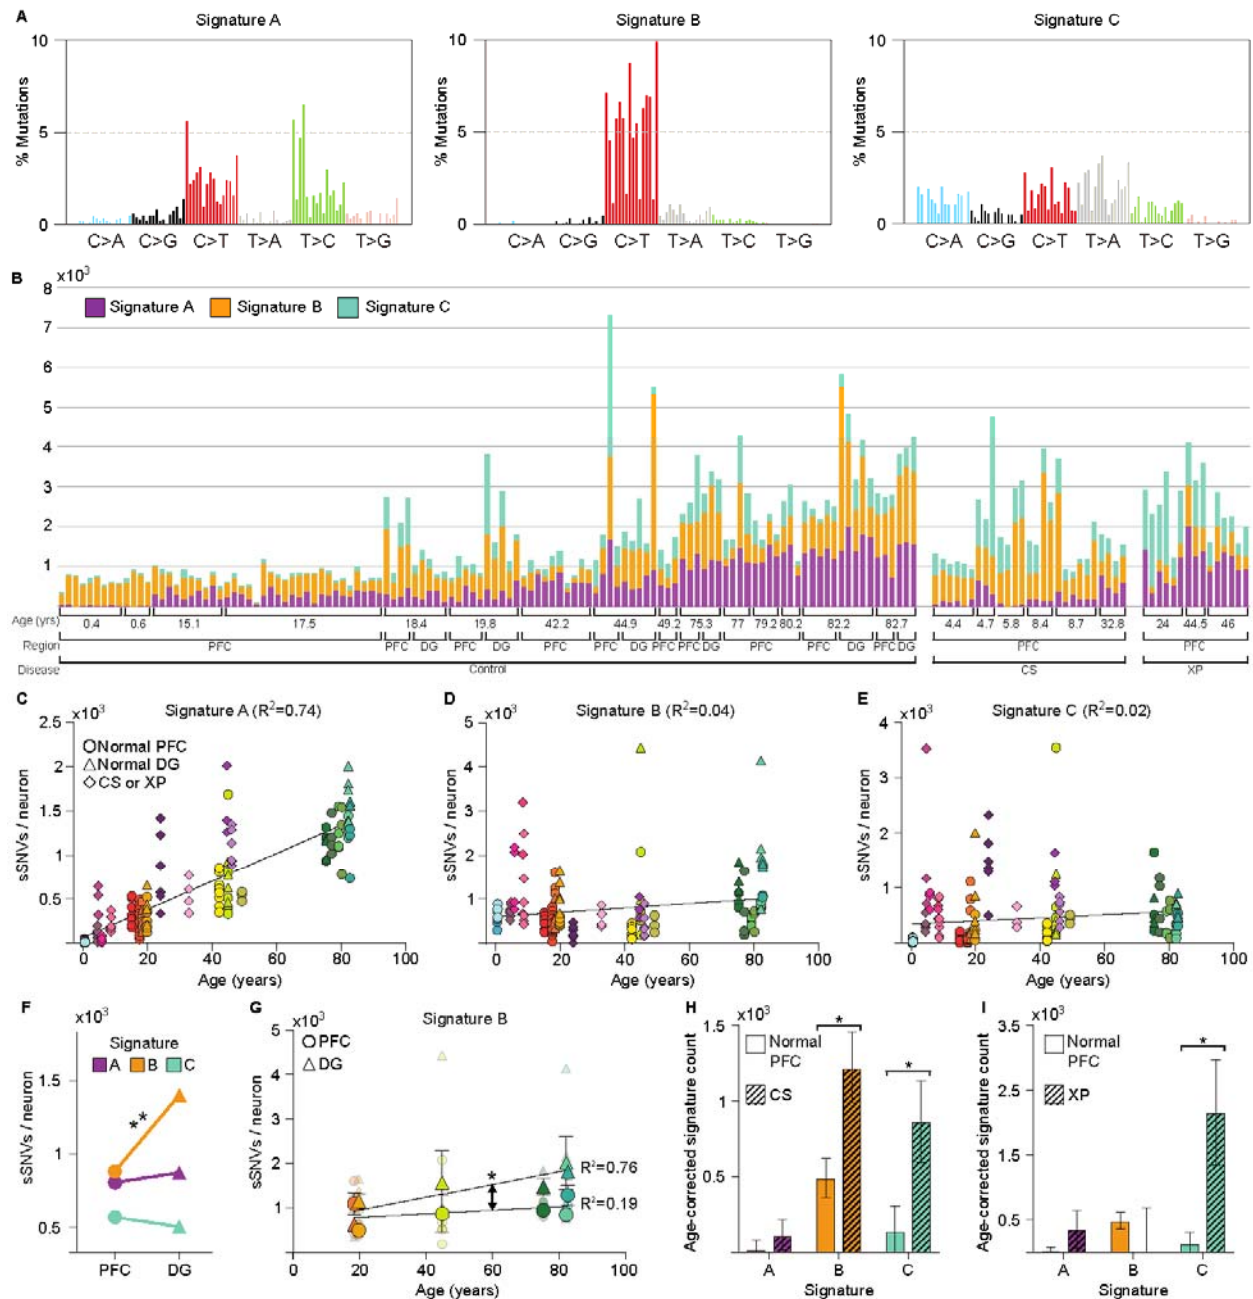

**Figure 3. Signature analysis reveals mutational processes during aging, across brain regions, and in disease.** (A) Three mutational signatures identified by matrix factorization (each substitution is classified by its trinucleotide context). (B) Number of variants from Signatures A, B, and C in each of the 161 neurons in the dataset. (C-E) Signature A strongly correlates with age, regardless of disease status or brain region, while Signatures B and C do not. (F) Signature B is enriched in DG relative to PFC neurons. (G) Signature B increased with age in DG neurons, but not in matched PFC neurons, revealing a DG-specific aging signature. Solid shapes represent regional means, and transparent shapes represent individual neurons. (H-I) Comparison of age-corrected estimate of sSNVs per signature in CS and XP compared to



PFC controls revealed enrichment in Signature C in both CS and XP. \* and \*\* denote  $p \leq 0.05$  and  $p \leq 0.001$ , respectively, mixed linear model.

## References

1. C. Lopez-Otin, M. A. Blasco, L. Partridge, M. Serrano, G. Kroemer, The Hallmarks of Aging. *Cell* **153**, 1194-1217 (2013).
2. T. Lu *et al.*, Gene regulation and DNA damage in the ageing human brain. *Nature* **429**, 883-891 (2004).
3. J. A. Martelijn, H. Lans, W. Vermeulen, J. H. Hoeijmakers, Understanding nucleotide excision repair and its roles in cancer and ageing. *Nat Rev Mol Cell Biol* **15**, 465-481 (2014).
4. H. Giese, M. E. Dolle, A. Hezel, H. van Steeg, J. Vijg, Accelerated accumulation of somatic mutations in mice deficient in the nucleotide excision repair gene XPA. *Oncogene* **18**, 1257-1260 (1999).
5. M. E. Dolle, W. K. Snyder, D. B. Dunson, J. Vijg, Mutational fingerprints of aging. *Nucleic Acids Res* **30**, 545-549 (2002).
6. M. E. Dolle *et al.*, Increased genomic instability is not a prerequisite for shortened lifespan in DNA repair deficient mice. *Mutat Res* **596**, 22-35 (2006).
7. R. A. Busuttil *et al.*, Intra-organ variation in age-related mutation accumulation in the mouse. *PLoS One* **2**, e876 (2007).
8. M. L. Hoang *et al.*, Genome-wide quantification of rare somatic mutations in normal human tissues using massively parallel sequencing. *Proc Natl Acad Sci U S A* **113**, 9846-9851 (2016).
9. J. P. Dumanski, A. Piotrowski, Structural genetic variation in the context of somatic mosaicism. *Methods Mol Biol* **838**, 249-272 (2012).
10. S. J. van Veluw *et al.*, Prefrontal cortex cytoarchitecture in normal aging and Alzheimer's disease: a relationship with IQ. *Brain Struct Funct*, (2012).
11. P. S. Eriksson *et al.*, Neurogenesis in the adult human hippocampus. *Nat Med* **4**, 1313-1317 (1998).
12. G. D. Evrony *et al.*, Single-neuron sequencing analysis of L1 retrotransposition and somatic mutation in the human brain. *Cell* **151**, 483-496 (2012).
13. M. A. Lodato *et al.*, Somatic mutation in single human neurons tracks developmental and transcriptional history. *Science* **350**, 94-98 (2015).
14. C. L. Bohrsen *et al.*, Linked-read analysis identifies mutations in single-cell DNA sequencing data. *bioRxiv*, (2017).
15. G. Genovese *et al.*, Clonal hematopoiesis and blood-cancer risk inferred from blood DNA sequence. *N Engl J Med* **371**, 2477-2487 (2014).
16. J. L. Hazen *et al.*, The Complete Genome Sequences, Unique Mutational Spectra, and Developmental Potency of Adult Neurons Revealed by Cloning. *Neuron* **89**, 1223-1236 (2016).
17. I. Martincorena *et al.*, Tumor evolution. High burden and pervasive positive selection of somatic mutations in normal human skin. *Science* **348**, 880-886 (2015).
18. E. T. Lim *et al.*, Rates, distribution and implications of postzygotic mosaic mutations in autism spectrum disorder. *Nat Neurosci* **20**, 1217-1224 (2017).
19. Y. Hou *et al.*, Single-cell exome sequencing and monoclonal evolution of a JAK2-negative myeloproliferative neoplasm. *Cell* **148**, 873-885 (2012).
20. R. De Bont, N. van Larebeke, Endogenous DNA damage in humans: a review of quantitative data. *Mutagenesis* **19**, 169-185 (2004).
21. L. Szilard, On the Nature of the Aging Process. *Proc Natl Acad Sci U S A* **45**, 30-45 (1959).

22. L. B. Alexandrov *et al.*, Clock-like mutational processes in human somatic cells. *Nat Genet* **47**, 1402-1407 (2015).
23. F. B. Dean, J. R. Nelson, T. L. Giesler, R. S. Lasken, Rapid amplification of plasmid and phage DNA using Phi 29 DNA polymerase and multiply-primed rolling circle amplification. *Genome Res* **11**, 1095-1099 (2001).
24. G. D. Evrony *et al.*, Cell lineage analysis in human brain using endogenous retroelements. *Neuron* **85**, 49-59 (2015).
25. H. Li, R. Durbin, Fast and accurate short read alignment with Burrows-Wheeler transform. *Bioinformatics* **25**, 1754-1760 (2009).
26. A. McKenna *et al.*, The Genome Analysis Toolkit: a MapReduce framework for analyzing next-generation DNA sequencing data. *Genome Research* **20**, 1297-1303 (2010).
27. S. T. Sherry *et al.*, dbSNP: the NCBI database of genetic variation. *Nucleic Acids Res* **29**, 308-311 (2001).
28. M. A. Sherman *et al.*, PaSD-qc: Quality control for single cell whole-genome sequencing data using power spectral density estimation. *bioRxiv*, (2017).
29. J. Wang, H. C. Fan, B. Behr, S. R. Quake, Genome-wide single-cell analysis of recombination activity and de novo mutation rates in human sperm. *Cell* **150**, 402-412 (2012).
30. C. F. de Bourcy *et al.*, A quantitative comparison of single-cell whole genome amplification methods. *PLoS One* **9**, e105585 (2014).
31. M. Lynch, Rate, molecular spectrum, and consequences of human mutation. *Proc Natl Acad Sci U S A* **107**, 961-968 (2010).
32. K. Baynton, R. P. Fuchs, Lesions in DNA: hurdles for polymerases. *Trends Biochem Sci* **25**, 74-79 (2000).
33. Y. Morita, S. Iwai, I. Kuraoka, A method for detecting genetic toxicity using the RNA synthesis response to DNA damage. *J Toxicol Sci* **36**, 515-521 (2011).
34. Y. Sonohara, S. Iwai, I. Kuraoka, An in vitro method for detecting genetic toxicity based on inhibition of RNA synthesis by DNA lesions. *Genes Environ* **37**, 8 (2015).
35. M. M. Jennerwein, A. Eastman, A polymerase chain reaction-based method to detect cisplatin adducts in specific genes. *Nucleic Acids Res* **19**, 6209-6214 (1991).
36. T. Woyke *et al.*, Decontamination of MDA reagents for single cell whole genome amplification. *PLoS One* **6**, e26161 (2011).
37. K. Diderich, M. Alanazi, J. H. Hoeijmakers, Premature aging and cancer in nucleotide excision repair-disorders. *DNA Repair (Amst)* **10**, 772-780 (2011).
38. P. Green, B. Ewing, W. Miller, P. J. Thomas, E. D. Green, Transcription-associated mutational asymmetry in mammalian evolution. *Nat Genet* **33**, 514-517 (2003).
39. P. Polak, P. F. Arndt, Transcription induces strand-specific mutations at the 5' end of human genes. *Genome Res* **18**, 1216-1223 (2008).
40. A. C. Davison, D. V. Hinkley, *Bootstrap methods and their application*. (Cambridge University Press, Cambridge ; New York, NY, USA, 1997), pp. x, 582 p.
41. L. B. Alexandrov, S. Nik-Zainal, D. C. Wedge, P. J. Campbell, M. R. Stratton, Deciphering signatures of mutational processes operative in human cancer. *Cell Rep* **3**, 246-259 (2013).
42. M. D. Young, M. J. Wakefield, G. K. Smyth, A. Oshlack, Gene ontology analysis for RNA-seq: accounting for selection bias. *Genome Biology* **11**, R14 (2010).
43. M. Ashburner *et al.*, Gene ontology: tool for the unification of biology. The Gene Ontology Consortium. *Nature Genetics* **25**, 25-29 (2000).
44. A. Fog, Sampling methods for Wallenius' and Fisher's noncentral hypergeometric distributions. *Communications in Statistics - Simulation Computation* **37**, 2410257 (2008).

45. S. Durinck, P. T. Spellman, E. Birney, W. Huber, Mapping identifiers for the integration of genomic datasets with the R/Bioconductor package biomaRt. *Nat Protoc* **4**, 1184-1191 (2009).
46. Y. Benjamini, Y. Hochberg, Controlling the false discovery rate: a practical and powerful approach to multiple testing. *Journal of the Royal Statistical Society. Series B (Methodological)* **57**, 289-300 (1995).
47. G. R. Crabtree, Our fragile intellect. Part I. *Trends in genetics : TIG* **29**, 1-3 (2013).
48. G. R. Crabtree, Our fragile intellect. Part II. *Trends Genet* **29**, 3-5 (2013).
49. I. Ezkurdia *et al.*, Multiple evidence strands suggest that there may be as few as 19,000 human protein-coding genes. *Hum Mol Genet* **23**, 5866-5878 (2014).
50. S. Herculano-Houzel, The human brain in numbers: a linearly scaled-up primate brain. *Front Hum Neurosci* **3**, 31 (2009).
51. G. Failla, The aging process and cancerogenesis. *Ann N Y Acad Sci* **71**, 1124-1140 (1958).
